# Supplementary material for: Pore size-optimized periodic mesoporous organosilicas for the enrichment of peptides and polymers
Source: Royal Society of Chemistry journal article supplement (doi:10.1039/c3ra41332b), 2013-01-01
Supplement: c3ra41332b.pdf [file c3ra41332b.pdf]

## Supplementary Information

# Pore Size-Optimized Periodic Mesoporous Organosilicas for Enrichment of Peptides and Polymers

*Kun Qian,<sup>a†</sup> Fang Liu,<sup>a†</sup> Jie Yang,<sup>a</sup> Xiaodan Huang,<sup>a</sup> Wenyi Gu,<sup>a</sup> Siddharth Jambhrunkar,<sup>a</sup> Pei Yuan<sup>b\*</sup> and Chengzhong Yu<sup>a\*</sup>*

<sup>a</sup> Australian Institute for Bioengineering and Nanotechnology, The University of Queensland, Brisbane, QLD 4072, Australia. <sup>b</sup> State Key Laboratory of Heavy Oil Processing, China University of Petroleum, No. 18 Fuxue Rd., Beijing, 102249. <sup>†</sup>These authors contributed equally to this work.

E-mail: c.yu@uq.edu.au; yuanpei@cup.edu.cn; Fax: (+)61-7-33463973

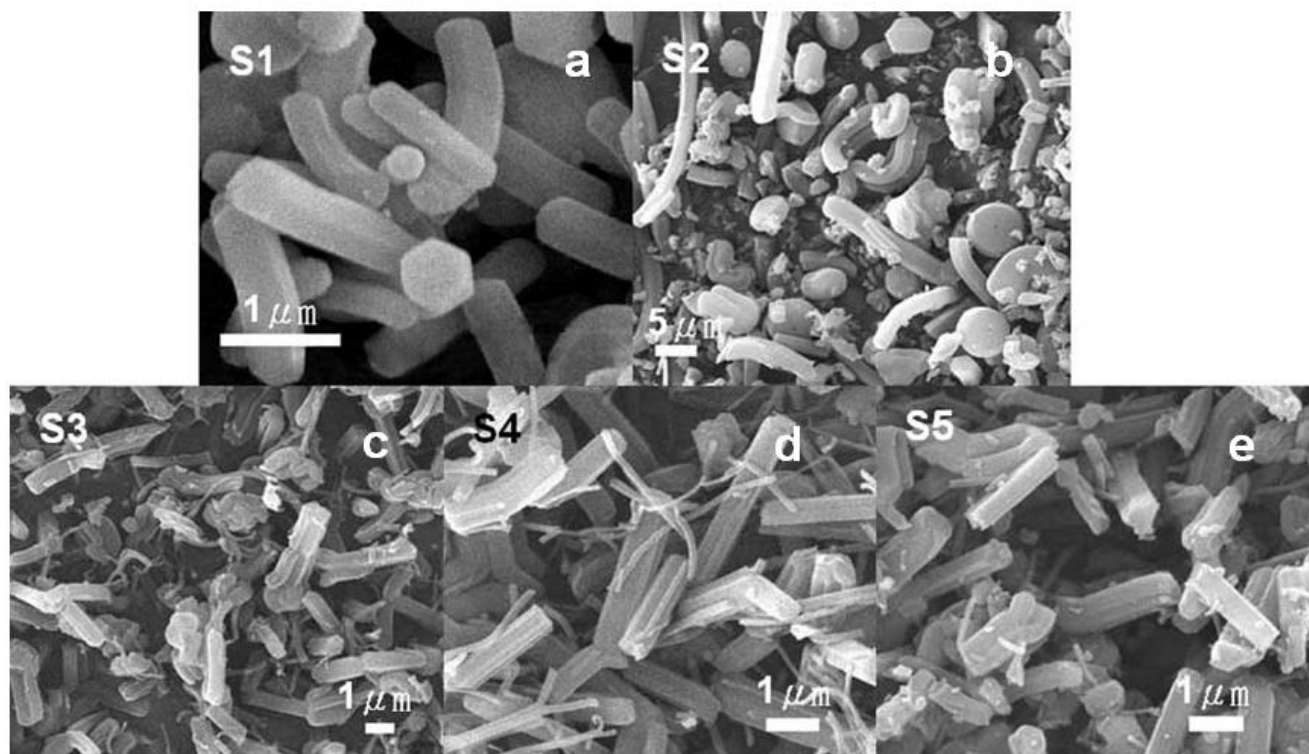

**Fig. S1** SEM images of S1 a), S2 b), S3 c), S4 d) and S5 e).

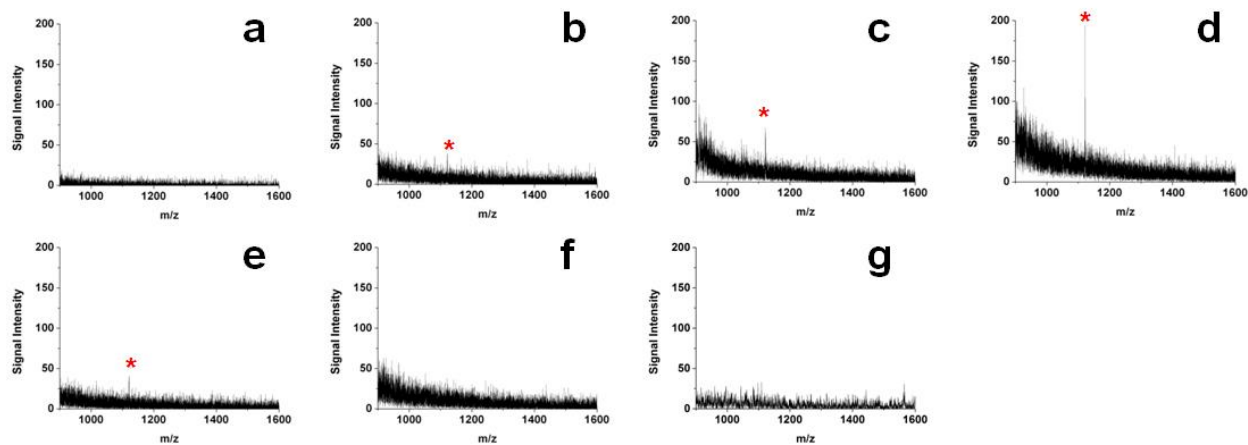

**Fig. S2** MALDI-TOF MS spectra obtained from 0.01 ng/ $\mu$ L E7 peptide solution a), after enrichment by S1 b), S2 c), S3 d), S4 e), S5 f) and non-mesoporous organosilica g) under 45% laser intensity.

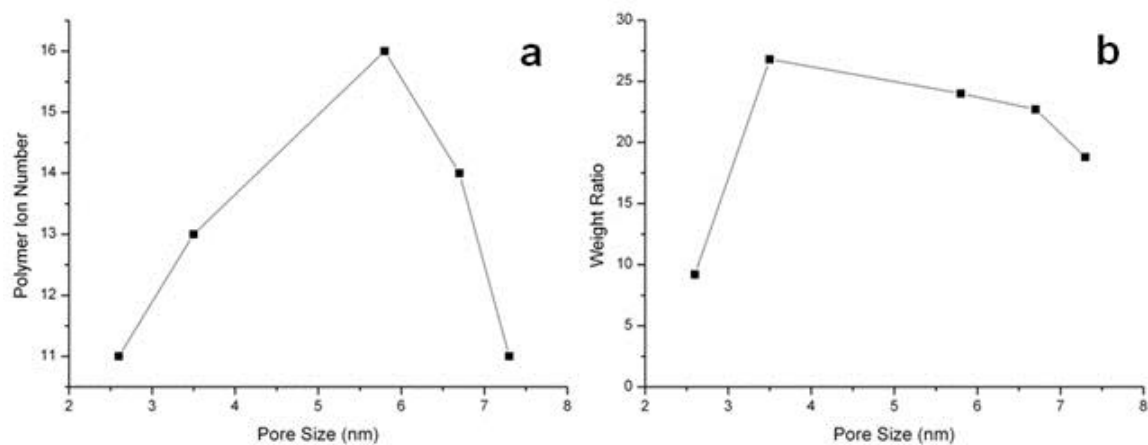

**Fig. S3** Polymer ion number in the MS spectra after enrichment by the PMO materials with different pore size based on MS a) and the weight ratio of polymer after saturated adsorption in the PMO materials with different pore sizes based on TGA b).
